# Supplementary material for: Theoretical insights into the reduction mechanism of neptunyl nitrate by hydrazine derivatives
Source: publisher site journal article supplement (doi:10.1515/ract-2021-1120), 2022-04-21
Supplement: Supplementary file 1 [file j_ract-2021-1120_suppl.docx]

**Electronic Supplementary Information**

**Theoretical insights into the reduction mechanism of neptunyl nitrate by hydrazine derivatives**

Zhong-Ping Cheng,†, ‡ Xiao-Bo Li,‡ Qun-Yan Wu,*‡

Zhi-Fang Chai,‡,& and Wei-Qun Shi*,‡

†State Key Laboratory of Nuclear Resources and Environment, East China University of Technology, Nanchang, Jiangxi, 330013, China

‡Laboratory of Nuclear Energy Chemistry, Institute of High Energy Physics, Chinese Academy of Sciences, Beijing, 100049, China

&Engineering Laboratory of Advanced Energy Materials, Ningbo Institute of Industrial Technology, Chinese Academy of Sciences, Ningbo, Zhejiang, 315201, China

**
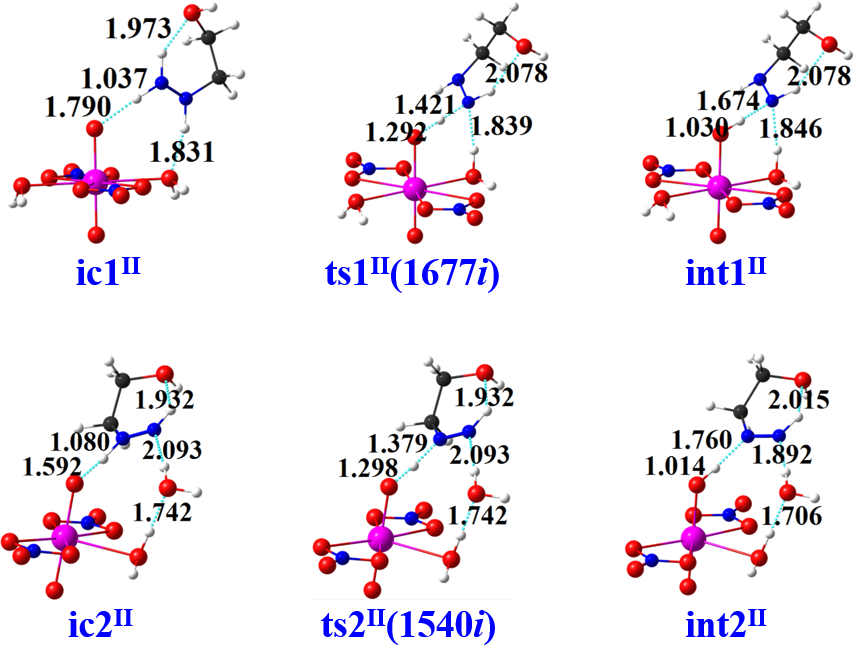
**

**Figure S1:** Optimized structures and bond distances (Å) of pathway II for reaction of [NpVIO2(H2O)2(NO3)2] with HOC2H4N2H3 in aqueous phase at the B3LYP/ECP60MWB/6-31G(d) level of theory. Values in parentheses are transition state imaginary frequencies (cm-1).


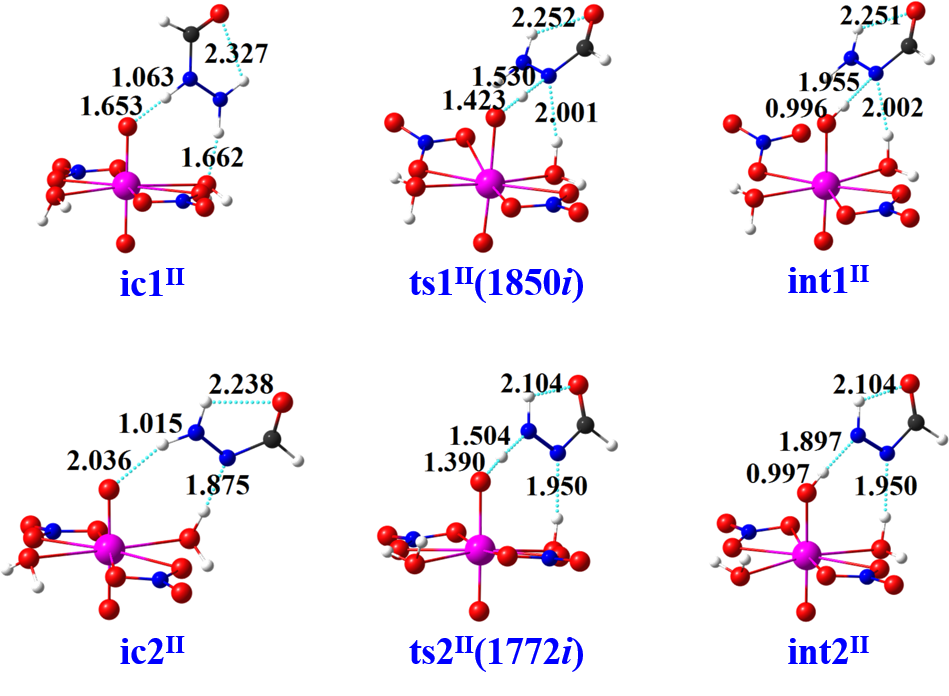


**Figure S2:** Optimized structures and bond distances (Å) of pathway II for reaction of [NpVIO2(H2O)2(NO3)2] with CHON2H3 in aqueous phase at the B3LYP/ECP60MWB/6-31G(d) level of theory. Values in parentheses are transition state imaginary frequencies (cm-1).

**
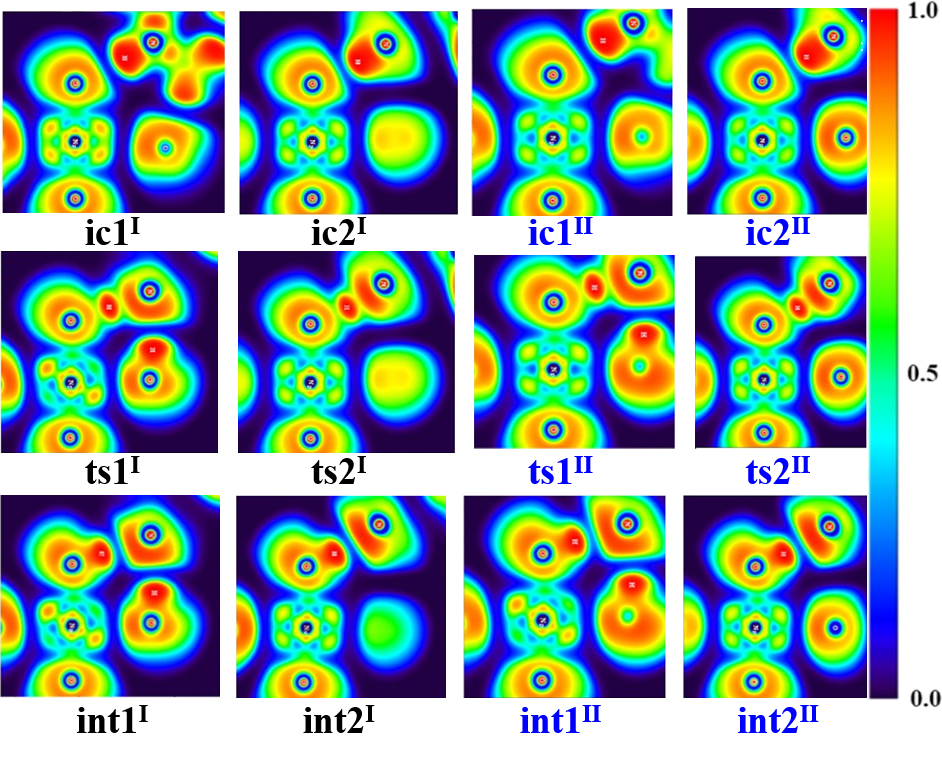
**

**Figure S3:** Two-dimensional ELF diagrams on the Np-Oax-N plane of the structures in pathways I-II for the reaction of [NpVIO2(H2O)2(NO3)2] with HOC2H4N2H3 at the B3LYP/ECP60MWB/6-31G(d) level of theory.


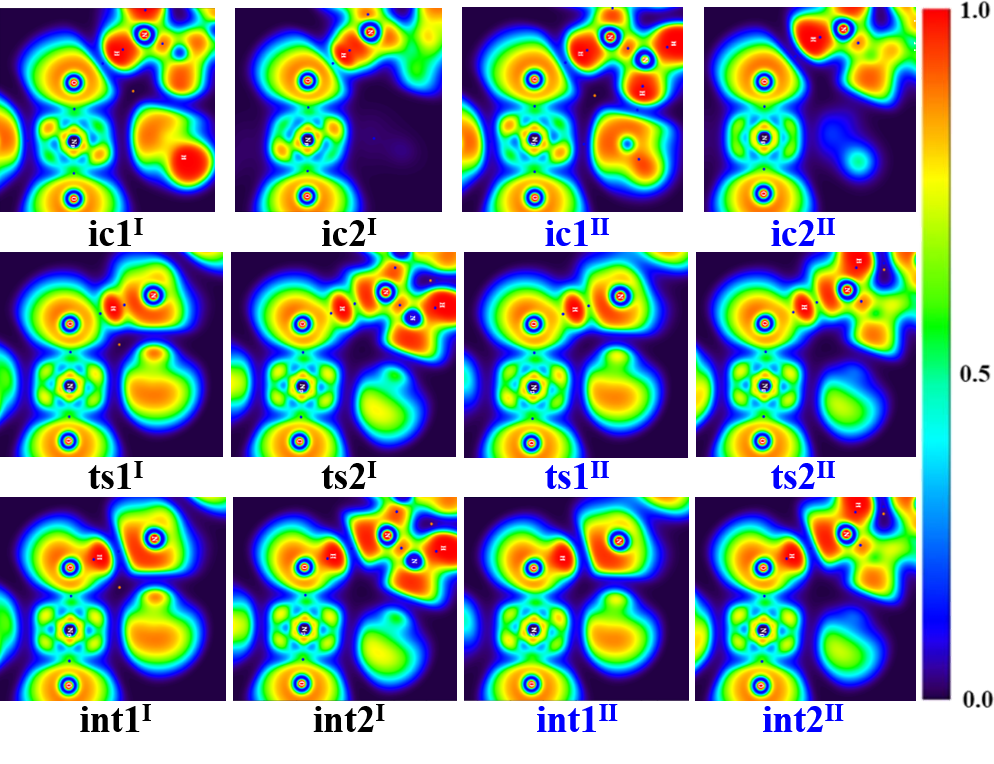


**Figure S4:** Two-dimensional ELF diagrams on the Np-Oax-N plane of the structures in pathways I-II for the reaction of [NpVIO2(H2O)2(NO3)2] with CHON2H3 at the B3LYP/ECP60MWB/6-31G(d) level of theory.

Table S1. The O=Np=O bond angle (°) of in the structures for the reaction of [NpVIO2(H2O)2(NO3)2] with N2H4 at the B3LYP/ECP60MWB/6-31G(d) level of theory

| structures |  | structures |  |
| --- | --- | --- | --- |
| **ic1** | 179.70 | **ic3** | 179.93 |
| **ts1** | 179.21 | **ts3** | 174.94 |
| **int1** | 179.18 | **int3** | 174.92 |
| **ic2** | 179.41 | **ic4** | 179.98 |
| **ts2** | 179.40 | **ts4** | 179.75 |
| **int2** | 177.44 | **int4** | 179.72 |

Table S2. The O=Np=O bond angle (°) of in the structures of pathways I and II in the reaction of [NpVIO2(H2O)2(NO3)2] with HOC2H4N2H3 and CHON2H3 at the B3LYP/ECP60MWB/6-31G(d) level of theory

|  | HOC2H4N2H3 CHON2H3 | | | |
| --- | --- | --- | --- | --- |
| structures | Pathway I | Pathway II | Pathway I | Pathway II |
| **ic1** | 179.84 | 179.93 | 179.86 | 179.60 |
| **ts1** | 179.16 | 179.67 | 178.46 | 177.54 |
| **int1** | 179.11 | 179.22 | 178.43 | 177.51 |
| **ic2** | 179.77 | 179.42 | 179.31 | 179.24 |
| **ts2** | 179.15 | 179.40 | 176.95 | 177.33 |
| **int2** | 179.10 | 177.25 | 176.92 | 177.30 |

Table S3. Mayer bond order of N-H/Oax-H bonds in the structures of pathways I and II in the reaction of [NpVIO2(H2O)2(NO3)2] with HOC2H4N2H3 and CHON2H3 at the B3LYP/ECP60MWB/6-31G(d) level of theory

|  | HOC2H4N2H3 CHON2H3 | | | |
| --- | --- | --- | --- | --- |
| structures | Pathway I | Pathway II | Pathway I | Pathway II |
| **ic1** | 0.594/0.158 | 0.621/0.149 | 0.531/0.198 | 0.522/0.207 |
| **ts1** | 0.307/0.414 | 0.304/0.410 | 0.388/0.342 | 0.268/0.473 |
| **int1** | 0.163/0.542 | 0.182/0.530 | 0.111/0.600 | 0.104/0.615 |
| **ic2** | 0.492/0.220 | 0.483/0.228 | 0.384/0.292 | 0.713/0.057 |
| **ts2** | 0.321/0.357 | 0.322/0.354 | 0.248/0.477 | 0.245/0.482 |
| **int2** | 0.149/0.550 | 0.163/0.541 | 0.120/0.593 | 0.107/0.603 |
